# Supplementary material for: Double indexing overcomes inaccuracies in multiplex sequencing on the Illumina platform
Source: PubMed Central journal article supplement — Nucleic Acids Res. 2011 Oct 21;40(1):e3. doi: 10.1093/nar/gkr771 (PMC3245947; doi:10.1093/nar/gkr771), 2011-10-21
Supplement: supp_gkr771_nar-01571-met-k-2011-File005.pdf [file supp_gkr771_nar-01571-met-k-2011-File005.pdf]

# Double indexing overcomes inaccuracies in multiplex sequencing on the Illumina platform

Martin Kircher, Susanna Sawyer, and Matthias Meyer

## CONTENTS

### **SUPPLEMENTARY TABLES AND FIGURES**

|                                                                                                                                                         |   |
|---------------------------------------------------------------------------------------------------------------------------------------------------------|---|
| <b>Supplementary Table 1.</b> Primer sequences .....                                                                                                    | 2 |
| <b>Supplementary Table 2.</b> Index combination used for each library .....                                                                             | 3 |
| <b>Supplementary Table 3:</b> Fraction of false pairs observed when using different image analysis and base calling software .....                      | 3 |
| <b>Supplementary Table 4:</b> Quantifying false sample assignments in human sequencing data from single-indexed libraries .....                         | 4 |
| <b>Supplementary Table 5:</b> Quantifying false sample assignments in human and mouse transcriptome sequencing data from single-indexed libraries ..... | 4 |
| <b>Supplementary Figure 1:</b> Raw intensity values of false index pairs .....                                                                          | 5 |
| <b>Supplementary Figure 2:</b> Changes in the fraction of false index pairs .....                                                                       | 6 |

### **SUPPLEMENTARY METHODS .....**

|                                                                                          |    |
|------------------------------------------------------------------------------------------|----|
| 1. Quantifying false index pairs expected based on sequencing error alone .....          | 7  |
| 2. Analyzing intensity values from a random set of clusters with false index pairs ..... | 8  |
| 3. Reading each index twice from short-insert molecules .....                            | 11 |
| 4. Quantifying jumping PCR and other effects .....                                       | 11 |
| 5. Estimating false-assignment rates based on the occurrence of unused indexes .....     | 16 |
| 5. Identification of false sample assignments in single indexed data .....               | 17 |

### **SUPPLEMENTARY REFERENCES .....**

## Supplementary Table 1. Primer sequences

All primers were synthesized by Sigma-Aldrich (Steinheim, Germany). Indexing primers were purified using reverse phase cartridges (RPC). All other primers were purified by HPLC.

| Primer ID / index                                         | Sequence (5' -> 3')                                             |
|-----------------------------------------------------------|-----------------------------------------------------------------|
| <b><i>P7 indexing primers (first index)</i></b>           |                                                                 |
| So1_iPCR-MPI-97 AATCTTC                                   | CAAGCAGAAGACGGCATAACGAGATgaagattGTGACTGGAGTTCAGACGTGT           |
| So1_iPCR-MPI-98 ACCAACG                                   | CAAGCAGAAGACGGCATAACGAGATcggttggtGTGACTGGAGTTCAGACGTGT          |
| So1_iPCR-MPI-99 AGATGGC                                   | CAAGCAGAAGACGGCATAACGAGATgccatctGTGACTGGAGTTCAGACGTGT           |
| So1_iPCR-MPI-100 CCAGGTT                                  | CAAGCAGAAGACGGCATAACGAGATaacctggGTGACTGGAGTTCAGACGTGT           |
| So1_iPCR-MPI-101 CCGTTAG                                  | CAAGCAGAAGACGGCATAACGAGATctaacggGTGACTGGAGTTCAGACGTGT           |
| So1_iPCR-MPI-102 CGCCTCT                                  | CAAGCAGAAGACGGCATAACGAGATagaggcgGTGACTGGAGTTCAGACGTGT           |
| So1_iPCR-MPI-103 CTTGCGG                                  | CAAGCAGAAGACGGCATAACGAGATccgcaagGTGACTGGAGTTCAGACGTGT           |
| So1_iPCR-MPI-104 GGCGGAG                                  | CAAGCAGAAGACGGCATAACGAGATctccgccGTGACTGGAGTTCAGACGTGT           |
| So1_iPCR-MPI-105 TGGACGT                                  | CAAGCAGAAGACGGCATAACGAGATacgtccaGTGACTGGAGTTCAGACGTGT           |
| So1_iPCR-MPI-106 AACCATG                                  | CAAGCAGAAGACGGCATAACGAGATcatggttGTGACTGGAGTTCAGACGTGT           |
| So1_iPCR-MPI-107 CAGGAAG                                  | CAAGCAGAAGACGGCATAACGAGATcttcctgGTGACTGGAGTTCAGACGTGT           |
| So1_iPCR-MPI-108 CATACTT                                  | CAAGCAGAAGACGGCATAACGAGATaggtatgGTGACTGGAGTTCAGACGTGT           |
| So1_iPCR-MPI-109 CCAATCC                                  | CAAGCAGAAGACGGCATAACGAGATggattggGTGACTGGAGTTCAGACGTGT           |
| So1_iPCR-MPI-110 CCGGCGT                                  | CAAGCAGAAGACGGCATAACGAGATacgccggGTGACTGGAGTTCAGACGTGT           |
| So1_iPCR-MPI-111 CGCATAG                                  | CAAGCAGAAGACGGCATAACGAGATctatgcgGTGACTGGAGTTCAGACGTGT           |
| So1_iPCR-MPI-112 CGTAATC                                  | CAAGCAGAAGACGGCATAACGAGATgattacgGTGACTGGAGTTCAGACGTGT           |
| So1_iPCR-MPI-113 CGTTGGT                                  | CAAGCAGAAGACGGCATAACGAGATaccaacgGTGACTGGAGTTCAGACGTGT           |
| So1_iPCR-MPI-114 CTATACG                                  | CAAGCAGAAGACGGCATAACGAGATcgtatagGTGACTGGAGTTCAGACGTGT           |
| So1_iPCR-MPI-115 GACCTAC                                  | CAAGCAGAAGACGGCATAACGAGATgtaggtcGTGACTGGAGTTCAGACGTGT           |
| So1_iPCR-MPI-116 GATATTG                                  | CAAGCAGAAGACGGCATAACGAGATcaatcGTGACTGGAGTTCAGACGTGT             |
| So1_iPCR-MPI-117 AAGACGC                                  | CAAGCAGAAGACGGCATAACGAGATgcgtcttGTGACTGGAGTTCAGACGTGT           |
| So1_iPCR-MPI-118 GCAGTAT                                  | CAAGCAGAAGACGGCATAACGAGATatactgcGTGACTGGAGTTCAGACGTGT           |
| So1_iPCR-φX TTGCCGC                                       | CAAGCAGAAGACGGCATAACGAGATgccggcaGTGACTGGAGTTCAGACGTGT           |
| <b><i>P5 indexing primers (second index)</i></b>          |                                                                 |
| P5_iPCR-LP-1 TCGCAGG                                      | AATGATACGGCGACCACCGAGATCTACACcctgccaACACTCTTTCCCTACACGACGCTCTT  |
| P5_iPCR-LP-2 CTCTGCA                                      | AATGATACGGCGACCACCGAGATCTACACtgcagagACACTCTTTCCCTACACGACGCTCTT  |
| P5_iPCR-LP-3 CCTAGGT                                      | AATGATACGGCGACCACCGAGATCTACACacctaggACACTCTTTCCCTACACGACGCTCTT  |
| P5_iPCR-LP-4 GGATCAA                                      | AATGATACGGCGACCACCGAGATCTACACttgatccACACTCTTTCCCTACACGACGCTCTT  |
| P5_iPCR-LP-5 GCAAGAT                                      | AATGATACGGCGACCACCGAGATCTACACatcttgcACACTCTTTCCCTACACGACGCTCTT  |
| P5_iPCR-LP-6 ATGGAGA                                      | AATGATACGGCGACCACCGAGATCTACACcttccatACACTCTTTCCCTACACGACGCTCTT  |
| P5_iPCR-LP-7 CTCGATG                                      | AATGATACGGCGACCACCGAGATCTACACcatcgagACACTCTTTCCCTACACGACGCTCTT  |
| P5_iPCR-LP-8 GCTCGAA                                      | AATGATACGGCGACCACCGAGATCTACACtctgagcACACTCTTTCCCTACACGACGCTCTT  |
| P5_iPCR-LP-9 ACCAACT                                      | AATGATACGGCGACCACCGAGATCTACACagttgggtACACTCTTTCCCTACACGACGCTCTT |
| P5_iPCR-LP-10 CCGGTAC                                     | AATGATACGGCGACCACCGAGATCTACACgtaccggACACTCTTTCCCTACACGACGCTCTT  |
| P5_iPCR-LP-11 AACTCCG                                     | AATGATACGGCGACCACCGAGATCTACACcggagttACACTCTTTCCCTACACGACGCTCTT  |
| P5_iPCR-LP-12 TTGAAGT                                     | AATGATACGGCGACCACCGAGATCTACACacttcaaACACTCTTTCCCTACACGACGCTCTT  |
| P5_iPCR-LP-13 ACTATCA                                     | AATGATACGGCGACCACCGAGATCTACACtgatagtACACTCTTTCCCTACACGACGCTCTT  |
| IS4 AGATCTC                                               | AATGATACGGCGACCACCGAGATCTACACTCTTTCCCTACACGACGCTCTT             |
| <b><i>amplification primers for indexed libraries</i></b> |                                                                 |
| IS5                                                       | AATGATACGGCGACCACCGA                                            |
| IS6                                                       | CAAGCAGAAGACGGCATAACGA                                          |
| <b><i>sequencing primer</i></b>                           |                                                                 |
| P5 index sequencing                                       | AGATCGGAAGAGCGTCGTGTAGGGAAAGAGTGT                               |

**Supplementary Table 2. Index combination used for each library**

| Experiment MP-CAP |                      |                  | Experiments no-CAP and SP-CAP |                  |                |        |                      |                  |
|-------------------|----------------------|------------------|-------------------------------|------------------|----------------|--------|----------------------|------------------|
| Sample            | Index 1              | Index 2          | Sample                        | Index 1          | Index 2        | Sample | Index 1              | Index 2          |
| L1                | AATCTTC<br>(97)      | TCGCAGG<br>(1)   | L1                            | AATCTTC<br>(97)  | TCGCAGG<br>(1) | L10    | AACCATG<br>(106)     | CCGGTAC<br>(10)  |
| L2                | ACCAACG<br>(98)      | CTCTGCA<br>(2)   | L2                            | ACCAACG<br>(98)  | CTCTGCA<br>(2) | L11    | CCAATCC<br>(109)     | ACTATCA<br>(13)  |
| L3                | AGATGGC<br>(99)      | CCTAGGT<br>(3)   | L3                            | AGATGGC<br>(99)  | CCTAGGT<br>(3) | L12    | CCGGCGT<br>(110)     | TCGCAGG<br>(1)   |
| L4                | CCAGGTT<br>(100)     | GGATCAA<br>(4)   | L4                            | CCAGGTT<br>(100) | GGATCAA<br>(4) | L13    | CGCATAG<br>(111)     | CTCTGCA<br>(2)   |
| L5                | CCGTTAG<br>(101)     | GCAAGAT<br>(5)   | L5                            | CCGTTAG<br>(101) | GCAAGAT<br>(5) | L14    | CGTAATC<br>(112)     | CCTAGGT<br>(3)   |
| L6                | CGCCTCT<br>(102)     | ATGGAGA<br>(6)   | L6                            | CGCCTCT<br>(102) | ATGGAGA<br>(6) | L15    | CGTTGGT<br>(113)     | GGATCAA<br>(4)   |
| L7                | CTTGCGG<br>(103)     | CTCGATG<br>(7)   | L7                            | CTTGCGG<br>(103) | CTCGATG<br>(7) | L16    | CAGGAAG<br>(107)     | AACTCCG<br>(11)  |
| L8                | GGCGGAG<br>(104)     | GCTCGAA<br>(8)   | L8                            | GGCGGAG<br>(104) | GCTCGAA<br>(8) | L17    | CTATACG<br>(114)     | GCAAGAT<br>(5)   |
| L9                | TGGACGT<br>(105)     | ACCAACT<br>(9)   | L9                            | TGGACGT<br>(105) | ACCAACT<br>(9) | φX     | TTGCCGC<br>(control) | AGATCTC<br>(IS4) |
| L10               | AACCATG<br>(106)     | CCGGTAC<br>(10)  |                               |                  |                |        |                      |                  |
| L16               | CAGGAAG<br>(107)     | AACTCCG<br>(11)  |                               |                  |                |        |                      |                  |
| φX                | TTGCCGC<br>(control) | AGATCTC<br>(IS4) |                               |                  |                |        |                      |                  |

**Supplementary Table 3: Fraction of false pairs observed when using different image analysis and base calling software**

The sequencing run was performed close to the release date of a new image analysis version and images were transferred off the instrument. Thus, image analysis of this sequencing run was done once with the Illumina RTA software version 1.6 (on the instrument) and once with Illumina OLB version 1.8. Later, the analysis was repeated using OLB 1.9. Results reported in the manuscript are all based on OLB 1.8, which identified between 18%-25% more clusters for the different lanes than the original instrument software run with RTA1.6/SCS2.6. Both new image analysis software versions increased the fraction of perfect index pairings in these lanes by 1-5% (using the same base caller). This indicates a lower sequencing error due to the improved identification and tracking of cluster positions in the images of the flow cell. However, when comparing the fraction of false index pairs, increased values are observed for the two new versions.

| RTA / OLB     | Raw clusters | Bustard       |     |             |       | Ibis          |     |             |       |
|---------------|--------------|---------------|-----|-------------|-------|---------------|-----|-------------|-------|
|               |              | Correct pairs |     | False pairs |       | Correct pairs |     | False pairs |       |
| <b>no-Cap</b> |              |               |     |             |       |               |     |             |       |
| 1.6           | 29133246     | 24116308      | 83% | 97315       | 0.40% | 25091043      | 86% | 126518      | 0.50% |
| 1.8           | 34241955     | 26765784      | 78% | 120236      | 0.45% | 29950674      | 87% | 175266      | 0.58% |
| 1.9           | 34241993     | 29962477      | 88% | 170564      | 0.57% | 29873025      | 87% | 177594      | 0.59% |
| <b>SP-Cap</b> |              |               |     |             |       |               |     |             |       |
| 1.6           | 38937256     | 27155457      | 70% | 125147      | 0.46% | 29042714      | 75% | 143824      | 0.49% |
| 1.8           | 48546372     | 34564560      | 71% | 159982      | 0.46% | 37690136      | 78% | 192995      | 0.51% |
| 1.9           | 48546297     | 37889964      | 78% | 193461      | 0.51% | 37426552      | 77% | 202081      | 0.54% |
| <b>MP-Cap</b> |              |               |     |             |       |               |     |             |       |
| 1.6           | 29245166     | 24246039      | 83% | 154789      | 0.63% | 25187487      | 86% | 179188      | 0.71% |
| 1.8           | 34684183     | 28316453      | 82% | 192938      | 0.68% | 30261682      | 87% | 230005      | 0.75% |
| 1.9           | 34684220     | 30525097      | 88% | 233016      | 0.76% | 30159122      | 87% | 230668      | 0.76% |

**Supplementary Table 4: Quantifying false sample assignments in human sequencing data from single-indexed libraries**

All forward reads were aligned to the  $\phi$ X174 genome using BWA. False sample assignments (FSA) are defined as reads showing a sample index but an alignment to the phage genome. QF columns show the changes after applying a minimum quality score filter of 15 to the index read.

| HGDP ID   | Raw sequences | Algn $\phi$ X index | Algn Sample index | FSA rate | Algn $\phi$ X index (QF) | Algn Sample index (QF) | FSA rate (QF) | Kept $\phi$ X index (QF) | Kept Sample index (QF) |
|-----------|---------------|---------------------|-------------------|----------|--------------------------|------------------------|---------------|--------------------------|------------------------|
| HGDP00456 | 30562322      | 755869              | 1471              | 0.194%   | 743437                   | 231                    | 0.031%        | 98.36%                   | 15.70%                 |
| HGDP00998 | 31188058      | 483305              | 409               | 0.085%   | 473923                   | 56                     | 0.012%        | 98.06%                   | 13.69%                 |
| HGDP00665 | 34994524      | 781560              | 803               | 0.103%   | 768559                   | 58                     | 0.008%        | 98.34%                   | 7.22%                  |
| HGDP00491 | 37133303      | 866342              | 943               | 0.109%   | 852285                   | 49                     | 0.006%        | 98.38%                   | 5.20%                  |
| HGDP00711 | 39665263      | 758411              | 876               | 0.115%   | 738413                   | 77                     | 0.010%        | 97.36%                   | 8.79%                  |
| HGDP01224 | 35608002      | 968626              | 1238              | 0.128%   | 956959                   | 85                     | 0.009%        | 98.80%                   | 6.87%                  |
| HGDP00551 | 36576315      | 720162              | 1583              | 0.219%   | 691189                   | 144                    | 0.021%        | 95.98%                   | 9.10%                  |

**Supplementary Table 5: Quantifying false sample assignments in human and mouse transcriptome sequencing data from single-indexed libraries, which were prepared using Illumina's TruSeq RNA Sample Prep Kit**

All single reads were aligned to the  $\phi$ X174 genome using BWA. False sample assignments are defined as reads showing one of the 12 sample indexes but an alignment to the phage genome. QF columns show the changes after applying a minimum quality score filter of 15 to the index read.

| Lane | Raw reads | Algn PhiX index | Ave. algn sample index | False sample assignments | Algn PhiX index QF | Ave. algn sample index QF | False sample assignments QF |
|------|-----------|-----------------|------------------------|--------------------------|--------------------|---------------------------|-----------------------------|
| 1    | 45990409  | 563645          | 906                    | 0.160%                   | 551229             | 304                       | 0.055%                      |
| 2    | 42400537  | 611873          | 872                    | 0.142%                   | 600333             | 307                       | 0.051%                      |
| 3    | 44098398  | 482999          | 736                    | 0.152%                   | 474908             | 270                       | 0.057%                      |
| 4    | 43447369  | 597251          | 882                    | 0.147%                   | 586811             | 315                       | 0.054%                      |
| 5    | 50775674  | 412854          | 691                    | 0.167%                   | 404888             | 242                       | 0.060%                      |

### Supplementary Figure 1: Raw intensity values of false index pairs

We extracted the raw intensities from single clusters that were identified with a false index pair in each of the tiles 1, 10, 20, 30, 40, 50, 60, 70, 80, 90, 100, 110, and 120 in the no-CAP experiment. The intensity values for both index reads of these twelve clusters are available in the Supplementary Text. All of them show intensity distributions indicative of non-pure clusters. Here, we show a visualization of the intensity values for tile 1 and 30. Illumina uses four fluorescent dyes to distinguish the four nucleotides A, C, G and T. Of these, two pairs (A/C and G/T) are excited using the same laser and are similar in their emission spectra. They are only partially separated using optical filters. A fluorophores are also measured in the C channel and G fluorophores are also measured in the T channel. Thus, an A can be identified by strong signals in both the A and the C channel, while a C will only show a strong signal in the C channel. The same applies for G/T. Hence, a strong signal in A/C excludes another signal in G/T channels for pure clusters. Hence, a strong signal in A/C excludes another signal in G/T channels for pure clusters.

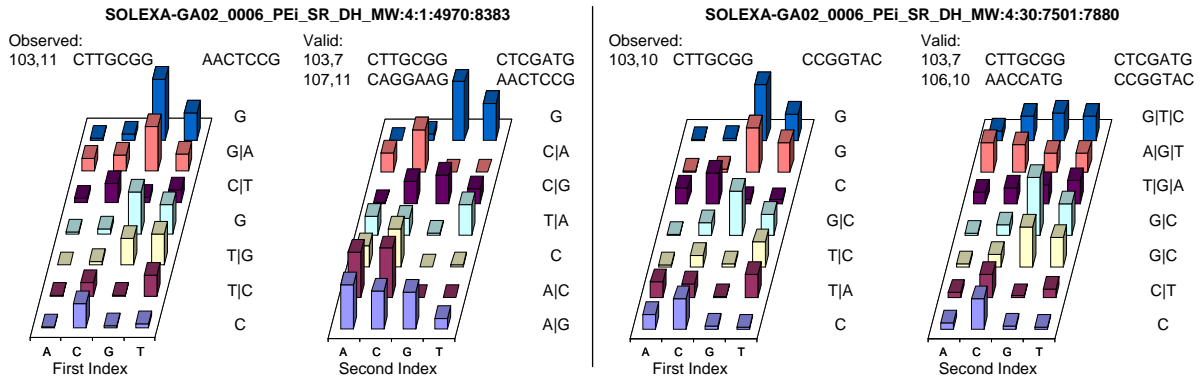

**Supplementary Figure 2: Changes in the fraction of false index pairs when accepting template reads with an increasing number of bases with quality scores smaller or equal to 15 (no-CAP blue, SP-CAP red, MP-CAP blue).**

When considering a cutoff removing a little bit less raw data (dashed lines, right axis) than the Pass Filter flag (~20%; green lines), the applied filter removes slightly more false pairs in no-CAP and MP-CAP than the Pass Filter (PF) flag (sun symbols).

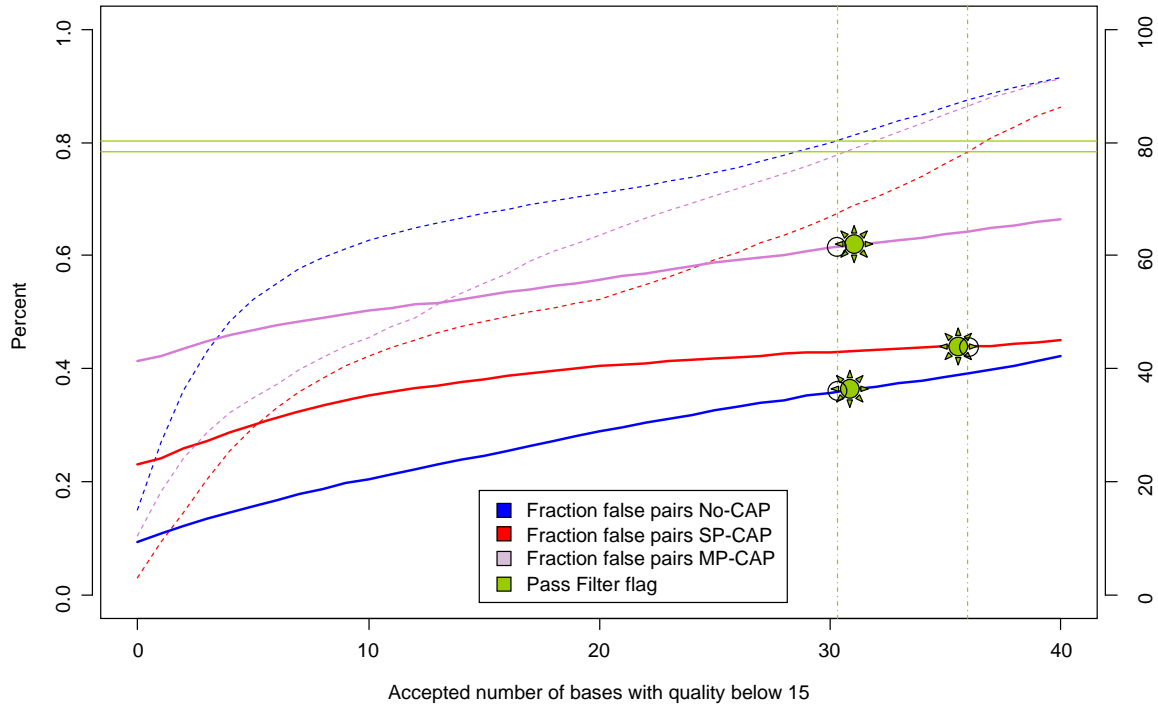

## SUPPLEMENTARY METHODS

### 1. Quantifying false index pairs expected based on sequencing error alone

To obtain an estimate of false pairs from random errors, direct application of the binomial distribution provides an overestimate as usually only a very small proportion of the erroneous variants will match another index. In the presented experiments, at most 18 first indexes and 13 second indexes were used. We also required perfect matches to the index sequences and thus only a specific set of errors will generate a certain other valid index sequence. As a result only 17 and 12 of the 16,383 ( $4^7-1$ ) erroneous variants, respectively, will contribute false index readouts. We can correct the estimate from the binomial distribution for this effect:

$$\sum_{x=1}^7 \frac{d_x}{\binom{7}{x} \cdot 3^x} \cdot \binom{7}{x} p^x (1-p)^{7-x}$$

The number of erroneous variants for a specific number of errors  $d_x$  can be inferred from the edit distance matrix of the 18 first index sequences:

```

[-, 6, 5, 6, 6, 5, 6, 7, 7, 3, 5, 7, 6, 4, 6, 6, 7, 5]
[6, -, 6, 6, 5, 5, 6, 5, 6, 3, 4, 6, 4, 5, 7, 5, 4, 7]
[5, 6, -, 5, 6, 6, 6, 5, 5, 6, 5, 6, 6, 5, 3, 7, 5, 5]
[6, 6, 5, -, 5, 5, 5, 5, 6, 6, 4, 3, 6, 5, 4, 5, 5, 7]
[6, 5, 6, 5, -, 5, 5, 5, 6, 6, 4, 4, 3, 6, 5, 3, 4, 6]
[5, 5, 6, 5, 5, -, 6, 5, 5, 5, 4, 5, 3, 5, 4, 6, 5, 6]
[6, 6, 6, 5, 5, 6, -, 5, 5, 6, 6, 3, 5, 5, 4, 4, 4, 4]
[7, 5, 5, 5, 5, 5, 5, -, 6, 5, 7, 6, 3, 6, 5, 4, 6, 7]
[7, 6, 5, 6, 6, 5, 5, 6, -, 7, 6, 3, 5, 5, 4, 6, 7, 3]
[3, 3, 6, 6, 6, 5, 6, 5, 7, -, 7, 7, 5, 5, 7, 4, 5, 6]
[5, 4, 5, 4, 4, 4, 6, 7, 6, 7, -, 5, 4, 4, 6, 6, 4, 6]
[7, 6, 6, 3, 4, 5, 3, 6, 3, 7, 5, -, 6, 6, 4, 4, 6, 4]
[6, 4, 6, 6, 3, 3, 5, 3, 5, 5, 4, 6, -, 4, 5, 4, 5, 7]
[4, 5, 5, 5, 6, 5, 5, 6, 5, 5, 4, 6, 4, -, 4, 5, 5, 6]
[6, 7, 3, 4, 5, 4, 4, 5, 4, 7, 6, 4, 5, 4, -, 6, 5, 6]
[6, 5, 7, 5, 3, 6, 4, 4, 6, 4, 6, 4, 4, 5, 6, -, 4, 6]
[7, 4, 5, 5, 4, 5, 4, 6, 7, 5, 4, 6, 5, 5, 5, 4, -, 6]
[5, 7, 5, 7, 6, 6, 4, 7, 3, 6, 6, 4, 7, 6, 6, 6, 6, -]

```

and the 13 indexes of the second index reads:

```

[-, 4, 5, 4, 6, 7, 7, 5, 4, 7, 7, 5, 6]
[4, -, 3, 6, 5, 6, 4, 5, 5, 4, 6, 7, 5]
[5, 3, -, 6, 5, 5, 4, 7, 5, 5, 4, 6, 6]
[4, 6, 6, -, 6, 6, 7, 6, 6, 6, 7, 3, 7]
[6, 5, 5, 6, -, 5, 6, 4, 5, 7, 6, 6, 4]
[7, 6, 5, 6, 5, -, 5, 5, 6, 5, 5, 6, 5]
[7, 4, 4, 7, 6, 5, -, 6, 5, 3, 4, 7, 5]
[5, 5, 7, 6, 4, 5, 6, -, 4, 7, 7, 7, 5]
[4, 5, 5, 6, 5, 6, 5, 4, -, 6, 5, 5, 7]
[7, 4, 5, 6, 7, 5, 3, 7, 6, -, 3, 4, 6]
[7, 6, 4, 7, 6, 5, 4, 7, 5, 3, -, 4, 5]
[5, 7, 6, 3, 6, 6, 7, 7, 5, 4, 4, -, 7]
[6, 5, 6, 7, 4, 5, 5, 5, 7, 6, 5, 7, -]

```

The matrix of 18 indexes indicates that on average 1.2 out of the 945 3-substitution variants, 3.1 out of the 2835 4-substitution variants, 5.6 out of the 5103 5-substitution, 5.3 out of the 5103 6-substitution variants and 1.8 out of 2187 7-substitution variants generate a valid other index of the forward index set. This corresponds to a  $d$  vector of (0, 0, 0, 1.2, 3.1, 5.6, 5.3, 1.8). For the second index set of 13 indexes, the  $d$  vector from the second matrix is (0, 0, 0, 0.6, 2.0, 3.7, 3.2, 2.5).

To apply the above binomial model, we also require an estimate of the average error rate for the three lanes. Such estimate can be obtained from the weighted average of error rates corresponding to the base quality scores ( $10^{QS/10}$ ) of the raw reads. This way we obtain estimates of 1.022% raw sequencing error in no-CAP, 1.435% error in SP-CAP and 1.059% error in MP-CAP. The higher error rate in SP-CAP is due to the higher loading density of this lane (see Supplementary Figure S3). Considering the maximum error rate of 1.435% for  $p$  in the above equation results in  $1.26E-07$  false index read outs for the first index set and  $6.30E-08$  for the second index set.

**Supplementary Figure S3:** Distribution of base quality scores in the index reads

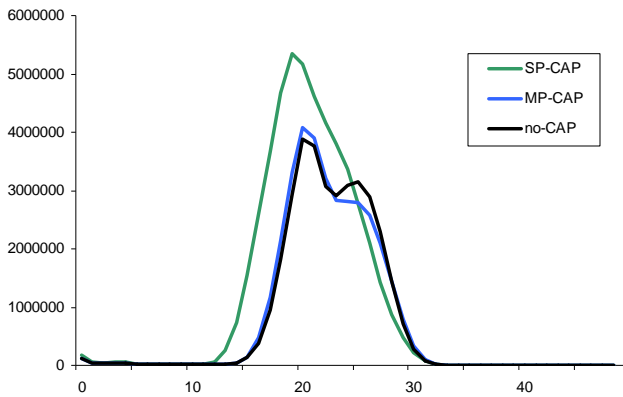

Adding the two rates for the forward and reverse set gives an upper estimate for false pairs of  $1.89E-07$ . This is an upper estimate as indexes are not independent in processing and both have to present a known index for the read to be considered. Direct application of the binomial model for a 1.435% error rate and without correcting for the number of valid erroneous index readouts would yield a rate of  $9.90E-05$  for single indexes and  $1.98E-04$  for index pairs.

## ***2. Analyzing intensity values from a random set of clusters with false index pairs***

We extracted the raw intensities from a single cluster that was identified with a false index pair in each of the tiles 1, 10, 20, 30, 40, 50, 60, 70, 80, 90, 100, 110, and 120 in the no-CAP experiment. The intensity values for both index reads of these twelve clusters are available in the table below. Illumina's software reports intensities as intensity minus surrounding noise. Thus, if a large signal is observed around the cluster, a negative intensity can be reported. Illumina uses four fluorescent dyes to distinguish the four nucleotides A, C, G and T. Of these, two pairs (A/C and G/T) are excited using the same laser and are similar in their emission spectra. They are only partially separated using optical filters. A fluorophores are also measured in the C channel and G fluorophores are



also measured in the T channel. Thus, an A can be identified by strong signals in both the A and the C channel, while a C will only show a strong signal in the C channel. The same applies for G/T. Hence, a strong signal in A/C excludes another signal in G/T channels for pure clusters. Even though more complex intensity distributions can also hint to non-pure clusters, we simply marked the cycles where intensities of at least 200 are observed in both the A/C and G/T channels. We found at least one such observation in each of the two twelve clusters.

| SOLEXA-GA02_0006_Pei_SR_DH_MW:4:1:4970:8383 |     |      |      |      | 103,11 | CTTGCGG,AACTCCG |      |      |      |
|---------------------------------------------|-----|------|------|------|--------|-----------------|------|------|------|
| Index1                                      | A   | C    | G    | T    | Index2 | A               | C    | G    | T    |
| 1                                           | 39  | 1138 | 63   | 176  | 1      | 1407            | 1205 | 1176 | 347  |
| 2                                           | 65  | 674  | 67   | 1005 | 2      | 1452            | 1574 | 15   | -44  |
| 3                                           | 0   | 188  | 1266 | 1502 | 3      | 645             | 1205 | -34  | 52   |
| 4                                           | 99  | 235  | 2025 | 1398 | 4      | 602             | 539  | 66   | 972  |
| 5                                           | 223 | 889  | 238  | 613  | 5      | 45              | 690  | 920  | 483  |
| 6                                           | 604 | 792  | 2154 | 827  | 6      | 617             | 1340 | -70  | -13  |
| 7                                           | 100 | 288  | 2920 | 1284 | 7      | 20              | 202  | 1879 | 1193 |

| SOLEXA-GA02_0006_Pei_SR_DH_MW:4:10:5818:20510 |      |      |     |      | 104,9  | GGCGGAG,ACCAACT |      |     |     |
|-----------------------------------------------|------|------|-----|------|--------|-----------------|------|-----|-----|
| Index1                                        | A    | C    | G   | T    | Index2 | A               | C    | G   | T   |
| 1                                             | -152 | -244 | 212 | 97   | 1      | 1335            | 1304 | 284 | 114 |
| 2                                             | -38  | -54  | 164 | 56   | 2      | 103             | 918  | 69  | 9   |
| 3                                             | -120 | 120  | -49 | -124 | 3      | 266             | 1129 | 52  | 139 |
| 4                                             | -85  | -3   | 162 | 10   | 4      | 1173            | 1229 | 64  | 25  |
| 5                                             | 26   | -26  | 186 | -5   | 5      | 1257            | 1151 | 175 | 93  |
| 6                                             | 119  | 24   | -75 | -15  | 6      | 271             | 893  | -35 | -15 |
| 7                                             | 20   | -42  | 117 | 58   | 7      | 70              | 192  | -52 | 988 |

| SOLEXA-GA02_0006_Pei_SR_DH_MW:4:20:6586:18234 |     |      |      |      | 103,9  | CTTGCGG,ACCAACT |     |     |     |
|-----------------------------------------------|-----|------|------|------|--------|-----------------|-----|-----|-----|
| Index1                                        | A   | C    | G    | T    | Index2 | A               | C   | G   | T   |
| 1                                             | 117 | 793  | 45   | 424  | 1      | 709             | 653 | 155 | -15 |
| 2                                             | -41 | 183  | 894  | 1177 | 2      | 91              | 428 | 83  | 95  |
| 3                                             | 78  | 196  | 906  | 1375 | 3      | 92              | 470 | -2  | 186 |
| 4                                             | 670 | 523  | 1827 | 942  | 4      | 576             | 630 | 20  | 180 |
| 5                                             | 192 | 1075 | 270  | 354  | 5      | 494             | 451 | 89  | 124 |
| 6                                             | 64  | 290  | 2429 | 1095 | 6      | 16              | 408 | 132 | 168 |
| 7                                             | 111 | 279  | 1849 | 982  | 7      | 203             | 233 | 388 | 603 |

| SOLEXA-GA02_0006_Pei_SR_DH_MW:4:30:7501:7880 |     |      |      |      | 103,10 | CTTGCGG,CCGGTAC |     |      |     |
|----------------------------------------------|-----|------|------|------|--------|-----------------|-----|------|-----|
| Index1                                       | A   | C    | G    | T    | Index2 | A               | C   | G    | T   |
| 1                                            | 703 | 1466 | 139  | 107  | 1      | 161             | 731 | 80   | 49  |
| 2                                            | 777 | 676  | 84   | 1121 | 2      | 138             | 570 | 46   | 221 |
| 3                                            | 73  | 546  | 115  | 1209 | 3      | 70              | 291 | 940  | 690 |
| 4                                            | 40  | 602  | 2108 | 994  | 4      | 37              | 238 | 1383 | 742 |
| 5                                            | 735 | 1480 | 222  | 175  | 5      | 268             | 386 | 450  | 561 |
| 6                                            | 82  | 143  | 2113 | 1402 | 6      | 719             | 654 | 469  | 451 |
| 7                                            | 89  | 119  | 2694 | 1264 | 7      | 238             | 586 | 656  | 590 |

| SOLEXA-GA02_0006_Pei_SR_DH_MW:4:40:7680:4448 |      |      |     |      | 109,9  | CCAATCC,ACCAACT |     |     |     |
|----------------------------------------------|------|------|-----|------|--------|-----------------|-----|-----|-----|
| Index1                                       | A    | C    | G   | T    | Index2 | A               | C   | G   | T   |
| 1                                            | 678  | 1180 | 86  | 224  | 1      | 462             | 391 | 8   | 254 |
| 2                                            | 593  | 1245 | 341 | 204  | 2      | 303             | 666 | 48  | -1  |
| 3                                            | 1163 | 1090 | 391 | 557  | 3      | 70              | 370 | 299 | 405 |
| 4                                            | 1514 | 1557 | 114 | 2    | 4      | 530             | 780 | 0   | 96  |
| 5                                            | 72   | 218  | 92  | 1370 | 5      | 721             | 647 | 52  | 369 |
| 6                                            | 196  | 838  | 392 | 585  | 6      | 196             | 387 | 605 | 398 |
| 7                                            | 299  | 1214 | 60  | 156  | 7      | 161             | 258 | 503 | 570 |

| SOLEXA-GA02_0006_Pei_SR_DH_MW:4:50:9834:15557 |     |     |     |     | 109,9  | CCAATCC,ACCAACT |      |     |      |
|-----------------------------------------------|-----|-----|-----|-----|--------|-----------------|------|-----|------|
| Index1                                        | A   | C   | G   | T   | Index2 | A               | C    | G   | T    |
| 1                                             | 55  | 227 | 63  | 59  | 1      | 1851            | 1757 | 50  | 63   |
| 2                                             | 119 | 326 | 38  | 66  | 2      | 219             | 1211 | 29  | 29   |
| 3                                             | 305 | 392 | 76  | 58  | 3      | 238             | 1121 | -11 | 227  |
| 4                                             | 289 | 437 | 48  | 10  | 4      | 1618            | 1595 | 38  | 64   |
| 5                                             | 83  | 99  | 34  | 110 | 5      | 1358            | 1287 | 61  | 239  |
| 6                                             | 99  | 344 | -34 | 44  | 6      | 168             | 1087 | 7   | 32   |
| 7                                             | 110 | 357 | 33  | 49  | 7      | 305             | 284  | 127 | 1217 |

| SOLEXA-GA02_0006_Pei_SR_DH_MW:4:60:9566:5016 |     |      |      |      | 103,9  | CTTGCGG,ACCAACT |     |     |     |
|----------------------------------------------|-----|------|------|------|--------|-----------------|-----|-----|-----|
| Index1                                       | A   | C    | G    | T    | Index2 | A               | C   | G   | T   |
| 1                                            | 393 | 1273 | 73   | 430  | 1      | 563             | 644 | 413 | 189 |
| 2                                            | 67  | 306  | 686  | 1101 | 2      | 68              | 433 | 147 | 130 |
| 3                                            | 459 | 445  | 782  | 1279 | 3      | 268             | 567 | 62  | 157 |
| 4                                            | 413 | 451  | 2282 | 1239 | 4      | 476             | 648 | 141 | 162 |
| 5                                            | 198 | 1218 | 824  | 425  | 5      | 450             | 724 | 329 | 219 |
| 6                                            | 99  | 182  | 2793 | 1349 | 6      | 277             | 615 | 331 | 199 |
| 7                                            | 100 | 231  | 1856 | 1217 | 7      | 268             | 294 | 250 | 665 |

| SOLEXA-GA02_0006_Pei_SR_DH_MW:4:70:7191:7553 |      |      |      |      | 103,11 | CTTGCGG,AACTCCG |     |      |     |
|----------------------------------------------|------|------|------|------|--------|-----------------|-----|------|-----|
| Index1                                       | A    | C    | G    | T    | Index2 | A               | C   | G    | T   |
| 1                                            | 88   | 1148 | 71   | 66   | 1      | 664             | 568 | 61   | 518 |
| 2                                            | 693  | 683  | -173 | 723  | 2      | 788             | 924 | 69   | 96  |
| 3                                            | -111 | -52  | 1081 | 1315 | 3      | 152             | 582 | 687  | 305 |
| 4                                            | 26   | 14   | 2614 | 1080 | 4      | 327             | 356 | 252  | 731 |
| 5                                            | 674  | 1206 | 55   | 54   | 5      | 141             | 526 | -33  | 418 |
| 6                                            | 588  | 566  | 1482 | 663  | 6      | 160             | 528 | 647  | 395 |
| 7                                            | 75   | 16   | 2407 | 987  | 7      | 12              | 35  | 2055 | 924 |

| SOLEXA-GA02_0006_Pei_SR_DH_MW:4:80:6406:10544 |     |     |     |     | 107,9  | CAGGAAG,ACCAACT |      |     |      |
|-----------------------------------------------|-----|-----|-----|-----|--------|-----------------|------|-----|------|
| Index1                                        | A   | C   | G   | T   | Index2 | A               | C    | G   | T    |
| 1                                             | 78  | 299 | 98  | 80  | 1      | 2111            | 1864 | 92  | 95   |
| 2                                             | 388 | 414 | 84  | 27  | 2      | 557             | 1408 | 25  | -9   |
| 3                                             | 51  | 54  | 668 | 318 | 3      | 284             | 1391 | 16  | 112  |
| 4                                             | 41  | 57  | 594 | 247 | 4      | 1428            | 1442 | 74  | 280  |
| 5                                             | 268 | 298 | 92  | 102 | 5      | 1612            | 1545 | 42  | 86   |
| 6                                             | 353 | 364 | 129 | 94  | 6      | 261             | 1147 | 28  | 50   |
| 7                                             | 72  | 110 | 610 | 257 | 7      | 51              | 58   | 575 | 1572 |

| SOLEXA-GA02_0006_Pei_SR_DH_MW:4:90:7464:1488 |     |     |     |     | 107,9  | CAGGAAG,ACCAACT |      |     |      |
|----------------------------------------------|-----|-----|-----|-----|--------|-----------------|------|-----|------|
| Index1                                       | A   | C   | G   | T   | Index2 | A               | C    | G   | T    |
| 1                                            | 114 | 431 | 49  | 54  | 1      | 1594            | 1421 | -7  | 20   |
| 2                                            | 580 | 494 | -8  | 80  | 2      | 463             | 1050 | 61  | 48   |
| 3                                            | 123 | 98  | 699 | 226 | 3      | 190             | 947  | -5  | 197  |
| 4                                            | 121 | 146 | 653 | 241 | 4      | 843             | 776  | 49  | 315  |
| 5                                            | 450 | 349 | 44  | 129 | 5      | 868             | 1042 | 4   | 58   |
| 6                                            | 425 | 447 | 72  | 27  | 6      | 160             | 818  | 16  | 47   |
| 7                                            | 87  | 81  | 504 | 261 | 7      | 19              | 11   | 615 | 1119 |

| SOLEXA-GA02_0006_Pei_SR_DH_MW:4:100:5684:7314 |      |     |      |     | 105,13 | TGGACGT,ACTATCA |      |     |      |
|-----------------------------------------------|------|-----|------|-----|--------|-----------------|------|-----|------|
| Index1                                        | A    | C   | G    | T   | Index2 | A               | C    | G   | T    |
| 1                                             | -1   | -22 | 62   | 559 | 1      | 1567            | 1600 | 111 | 88   |
| 2                                             | -113 | 31  | 835  | 436 | 2      | 175             | 1074 | 79  | 22   |
| 3                                             | 37   | 39  | 958  | 347 | 3      | 142             | 440  | -20 | 999  |
| 4                                             | 562  | 590 | 24   | 24  | 4      | 1557            | 1524 | 33  | -38  |
| 5                                             | 25   | 445 | 117  | -9  | 5      | 517             | 519  | 86  | 1015 |
| 6                                             | -66  | -57 | 1187 | 531 | 6      | 258             | 1076 | 30  | 59   |
| 7                                             | 47   | 93  | 22   | 196 | 7      | 1130            | 1066 | 107 | 382  |

| SOLEXA-GA02_0006_Pei_SR_DH_MW:4:110:6123:5197 |     |     |     |     | 104,13 | GGCGGAG,ACTATCA |      |     |      |
|-----------------------------------------------|-----|-----|-----|-----|--------|-----------------|------|-----|------|
| Index1                                        | A   | C   | G   | T   | Index2 | A               | C    | G   | T    |
| 1                                             | -39 | -7  | 866 | 392 | 1      | 1756            | 1500 | 575 | 341  |
| 2                                             | 55  | 87  | 718 | 309 | 2      | 267             | 1439 | 36  | -14  |
| 3                                             | 94  | 217 | 68  | 48  | 3      | 37              | 31   | 104 | 1642 |
| 4                                             | 43  | 18  | 675 | 324 | 4      | 1487            | 1457 | 16  | 31   |
| 5                                             | -83 | 37  | 624 | 318 | 5      | 77              | 86   | 734 | 1610 |
| 6                                             | 290 | 279 | 236 | 120 | 6      | 498             | 1315 | 16  | 67   |
| 7                                             | 98  | 120 | 564 | 203 | 7      | 1551            | 1502 | 107 | 103  |

| SOLEXA-GA02_0006_Pei_SR_DH_MW:4:120:4821:17030 |     |     |     |     | 106,9  | AACCATG,ACCAACT |      |     |     |
|------------------------------------------------|-----|-----|-----|-----|--------|-----------------|------|-----|-----|
| Index1                                         | A   | C   | G   | T   | Index2 | A               | C    | G   | T   |
| 1                                              | 277 | 361 | 40  | 43  | 1      | 1325            | 1181 | 216 | 90  |
| 2                                              | 394 | 418 | -38 | -21 | 2      | 308             | 944  | -11 | 14  |
| 3                                              | -22 | 123 | 301 | 96  | 3      | 286             | 893  | 414 | 285 |
| 4                                              | 110 | 276 | -9  | 5   | 4      | 1019            | 967  | 367 | 383 |
| 5                                              | 323 | 269 | 64  | 61  | 5      | 874             | 748  | 479 | 263 |
| 6                                              | 207 | 190 | 39  | 224 | 6      | 365             | 707  | 344 | 81  |
| 7                                              | 39  | 12  | 635 | 264 | 7      | 44              | 180  | 476 | 886 |

### ***3. Reading each index twice from short-insert molecules***

We searched the sequence data of the three experiments for short-insert molecules where the complete and error-free adapter sequences with perfectly matching indexes were obtained in both the forward and reverse read. We identified a total of 3,574,203, 1,699,585 and 3,451,555 such clusters in no-CAP, SP-CAP and MP-CAP. For no-CAP, in 411 out of 3,574,203 ( $11.499\text{E-}5$ ) of these observations, the indexes identified in the read out of the first index did not agree with its second read out. In 245 out of 3,574,203 ( $6.855\text{E-}5$ ) the indexes read out from the second index did not agree. We obtained similar rates for SP-CAP (Index1:  $209/1,699,585 = 12.297\text{E-}5$ , Index2:  $138/1,699,585 = 8.120\text{E-}5$ ) and MP-CAP (Index1:  $305/3,451,555 = 8.837\text{E-}5$ , Index2:  $275/3,451,555 = 7.967\text{E-}5$ ). In cases where the actual index reads provided conflicting information on sample origin in the no-CAP experiment ( $n=311$ ), the index read from the template read produced a valid index pair. Similar results were obtained for the two other experiments (SP-CAP 141 out of 149 observations, MP-CAP 99 out of 109).

### ***4. Quantifying jumping PCR and other effects***

We checked the frequency of all putative index pairs, also including (i) index sequences that have not participated in the experiment at all, but were synthesized in the same batch of indexed oligonucleotides, and (ii) indexes that participated in some step of the experiment but did not participate in the final pooling (see Supplementary Figures 4-6 below). In all three experiments we see a clear increase of correct pairs compared to background when filtering the raw data based on the index reads, i.e. excluding all clusters where at least one base in any of the two index reads has a base quality score below 15. The quality filter affects false index pairs stronger than correct pairs.

When comparing row/column medians to the median of the medians for rows/columns (Supplementary Figures 4-6 below), in some rows and columns we see overrepresentation of false index pairs compared to background. Considering the median values assumes that always a minority of index pairs is affected by cross-contamination and that libraries are pooled in equimolar ratio. The row and column median of medians are 26.5/24, 61/60, and 1208.25/1050 for no-CAP, SP-CAP, and MP-CAP, respectively. IS4 represents the index sequence obtained from the P5-adapter of single-indexed libraries (i.e. using primer IS4 for the preparation of single index libraries instead of a second indexed oligonucleotide). This sequence is expected for the  $\phi\text{X174}$  library, which was spiked into all sequencing lanes. IS4 shows a low reduction of counts when applying the quality filter to all three datasets and has much higher counts compared to the other rows. The IS4 medians are 1667, 2444 and 9055.5 for no-CAP, SP-CAP and MP-CAP respectively. This indicates contamination of the preparation chemicals (e.g. the PCR buffer) with the IS4 oligonucleotide from the Meyer and Kircher protocol (1). From no-CAP and SP-CAP, we estimate 0.11% and 0.25% contamination with IS4 correspondingly. Other examples of putative contamination include the second index 1 in no-CAP (5.8x higher than the median of medians) and the first index 106 in SP-CAP (10.6x higher than the median of medians). The figures clearly show individual pairs, e.g.

11/103 and 11/105 in no-CAP, 97/3 and 10/105 in SP-CAP, and 97/3 in MP-CAP that are overrepresented compared to background.

Indexes that were used in control reactions but not sequenced are seen 2-56 times more frequently in no-CAP than the ones not used in the experiment at all. This suggests handling contamination as one source of error. Assuming that higher frequency false index pairs (frequency five times higher than background) are due to contamination, we estimate that 0.04% of the 0.06% false pairs in no-CAP, 0.10% of the 0.14% false pairs in SP-CAP and 0.04% of the 0.43% false pairs in MP-CAP are due to cross-contamination of indexed oligonucleotides or libraries (Supplementary Tables 6.1-3 on the following pages).

**Supplementary Figure 4:** Counts of all index pairs before and after applying a minimum base quality score cutoff of 15 to the index reads. Shown are the result for experiment no-CAP, where libraries were amplified independently and pooled just prior to sequencing. The first index is plotted on the vertical axis, the second on the horizontal axis. Indexes with green labels did not participate in the experiment at all. Pink indexes were used during library preparation, but not included in the library pool for sequencing. The control library is identified by the combination of *control* and *IS4* (blue).

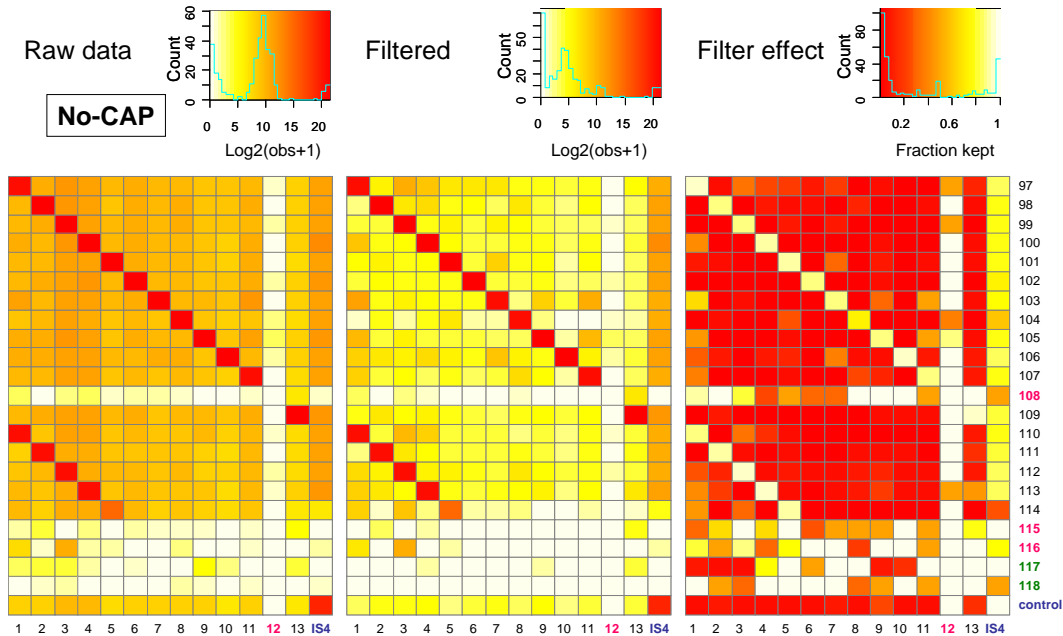

**Supplementary Figure 5:** Results for perfect index pairings in experiment SP-CAP, where all libraries were enriched and amplified individually and just pooled prior to

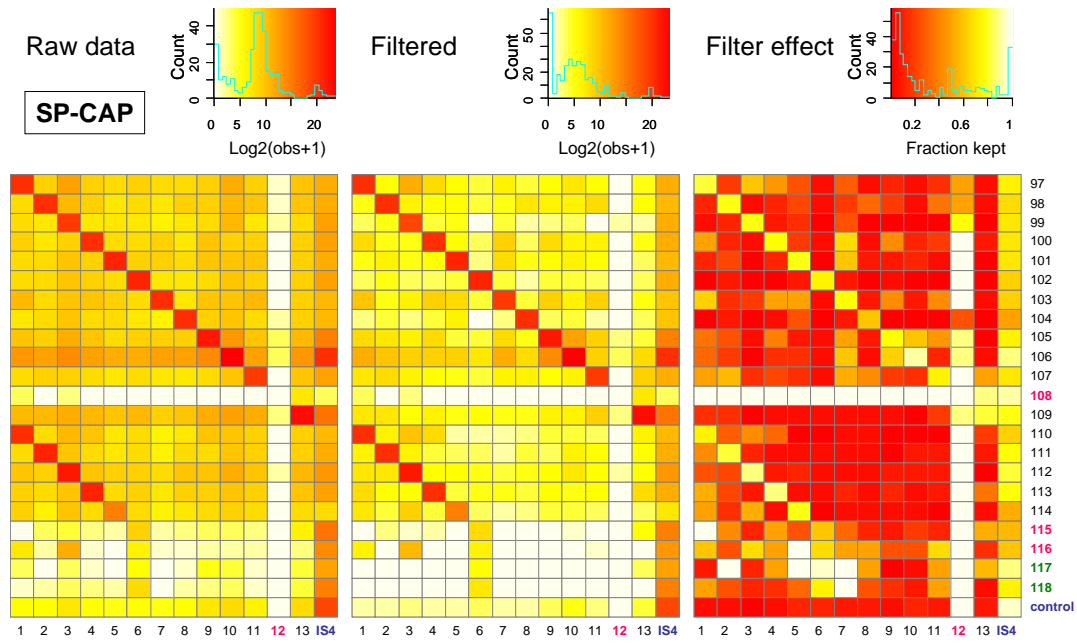

sequencing.

**Supplementary Figure 6:** Results for perfect index pairings in experiment MP-CAP, where all libraries were pooled prior to enrichment and amplification.

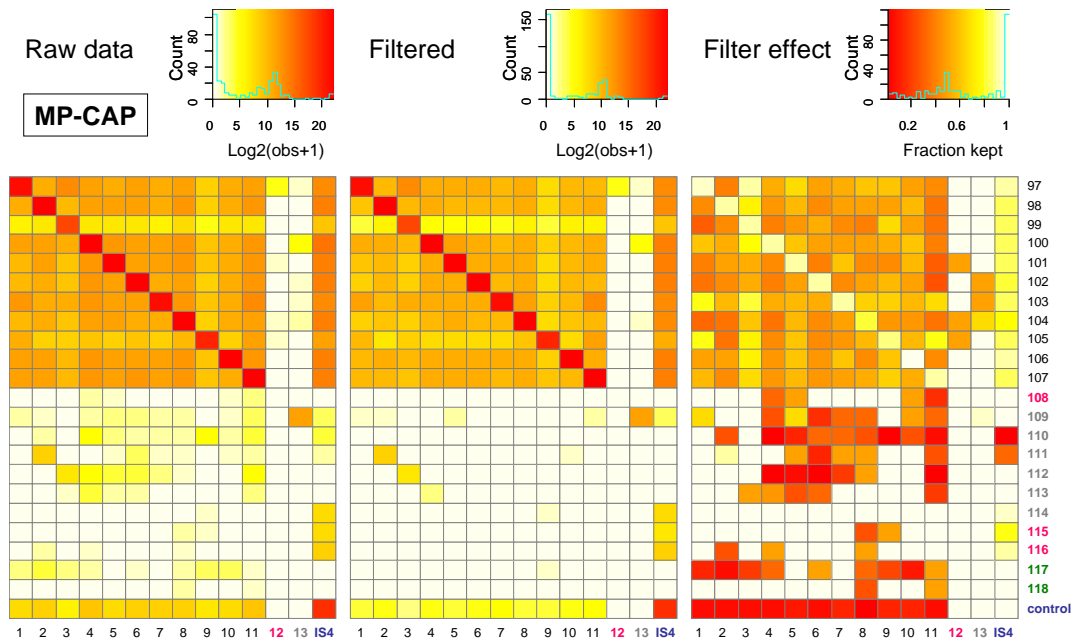

**Supplementary Table 6.1:** Index cross-contamination in no-CAP quantified from higher frequency false index pairs (five times above the medians of the row and column medians). The upper part of the table gives the counts for all false index pairs, while in the lower table (next page) the higher frequency values have been replaced by the average of the medians of row/column medians.

| Index     | 1    | 2  | 3    | 4   | 5   | 6    | 7   | 8    | 9   | 10 | 11   | 13  | RowMd |
|-----------|------|----|------|-----|-----|------|-----|------|-----|----|------|-----|-------|
| 97        |      | 60 | 1309 | 466 | 118 | 116  | 129 | 27   | 22  | 13 | 24   | 39  | 60    |
| 98        | 5    |    | 85   | 171 | 22  | 43   | 9   | 130  | 12  | 5  | 49   | 8   | 22    |
| 99        | 15   | 15 |      | 19  | 61  | 12   | 67  | 33   | 13  | 8  | 10   | 7   | 15    |
| 100       | 534  | 30 | 33   |     | 33  | 17   | 17  | 21   | 21  | 8  | 23   | 18  | 21    |
| 101       | 47   | 57 | 30   | 43  |     | 11   | 316 | 22   | 38  | 3  | 45   | 8   | 38    |
| 102       | 16   | 37 | 22   | 20  | 24  |      | 12  | 16   | 25  | 4  | 10   | 7   | 16    |
| 103       | 1705 | 19 | 79   | 40  | 21  | 28   |     | 6    | 262 | 12 | 1372 | 10  | 28    |
| 104       | 1    | 28 | 3    | 20  | 131 | 3    | 2   |      | 4   | 0  | 0    | 2   | 3     |
| 105       | 717  | 15 | 62   | 16  | 16  | 16   | 9   | 9    |     | 2  | 892  | 9   | 16    |
| 106       | 314  | 96 | 52   | 148 | 67  | 24   | 389 | 51   | 22  |    | 82   | 17  | 67    |
| 107       | 303  | 18 | 32   | 10  | 30  | 8    | 12  | 161  | 46  | 3  |      | 10  | 18    |
| 109       | 19   | 91 | 35   | 76  | 22  | 17   | 8   | 22   | 43  | 18 | 49   |     | 22    |
| 110       |      | 12 | 796  | 337 | 17  | 13   | 12  | 4    | 13  | 5  | 24   | 13  | 13    |
| 111       | 5    |    | 85   | 31  | 16  | 15   | 11  | 30   | 11  | 6  | 20   | 28  | 16    |
| 112       | 139  | 75 |      | 65  | 69  | 30   | 15  | 96   | 41  | 12 | 28   | 15  | 41    |
| 113       | 259  | 83 | 32   |     | 20  | 14   | 23  | 37   | 75  | 5  | 39   | 126 | 37    |
| 114       | 293  | 1  | 439  | 5   |     | 2    | 3   | 4    | 0   | 0  | 3    | 1   | 3     |
| ColMedian | 139  | 30 | 52   | 40  | 24  | 15.5 | 12  | 24.5 | 22  | 5  | 26   | 10  |       |

Total count 16049  
 Total number of correct pairs 26901906  
 0.060%

| Index | 1     | 2  | 3     | 4     | 5     | 6   | 7     | 8     | 9     | 10 | 11    | 13    |
|-------|-------|----|-------|-------|-------|-----|-------|-------|-------|----|-------|-------|
| 97    |       | 60 | 22.63 | 22.63 | 118   | 116 | 22.63 | 27    | 22    | 13 | 24    | 39    |
| 98    | 5     |    | 85    | 22.63 | 22    | 43  | 9     | 22.63 | 12    | 5  | 49    | 8     |
| 99    | 15    | 15 |       | 19    | 61    | 12  | 67    | 33    | 13    | 8  | 10    | 7     |
| 100   | 22.63 | 30 | 33    |       | 33    | 17  | 17    | 21    | 21    | 8  | 23    | 18    |
| 101   | 47    | 57 | 30    | 43    |       | 11  | 22.63 | 22    | 38    | 3  | 45    | 8     |
| 102   | 16    | 37 | 22    | 20    | 24    |     | 12    | 16    | 25    | 4  | 10    | 7     |
| 103   | 22.63 | 19 | 79    | 40    | 21    | 28  |       | 6     | 22.63 | 12 | 22.63 | 10    |
| 104   | 1     | 28 | 3     | 20    | 22.63 | 3   | 2     |       | 4     | 0  | 0     | 2     |
| 105   | 22.63 | 15 | 62    | 16    | 16    | 16  | 9     | 9     |       | 2  | 22.63 | 9     |
| 106   | 22.63 | 96 | 52    | 22.63 | 67    | 24  | 22.63 | 51    | 22    |    | 82    | 17    |
| 107   | 22.63 | 18 | 32    | 10    | 30    | 8   | 12    | 22.63 | 46    | 3  |       | 10    |
| 109   | 19    | 91 | 35    | 76    | 22    | 17  | 8     | 22    | 43    | 18 | 49    |       |
| 110   |       | 12 | 22.63 | 22.63 | 17    | 13  | 12    | 4     | 13    | 5  | 24    | 13    |
| 111   | 5     |    | 85    | 31    | 16    | 15  | 11    | 30    | 11    | 6  | 20    | 28    |
| 112   | 22.63 | 75 |       | 65    | 69    | 30  | 15    | 96    | 41    | 12 | 28    | 15    |
| 113   | 22.63 | 83 | 32    |       | 20    | 14  | 23    | 37    | 75    | 5  | 39    | 22.63 |
| 114   | 22.63 | 1  | 22.63 | 5     |       | 2   | 3     | 4     | 0     | 0  | 3     | 1     |

Total count 4777  
 Cross-contamination corrected 0.018%

**Supplementary Table 6.2:** Quantification of index cross-contamination in SP-CAP from higher frequency false index pairs.

| Index     | 1    | 2   | 3    | 4   | 5   | 6   | 7    | 8    | 9    | 10   | 11  | 13   | RowMd |
|-----------|------|-----|------|-----|-----|-----|------|------|------|------|-----|------|-------|
| 97        |      | 68  | 2536 | 277 | 64  | 22  | 76   | 14   | 65   | 150  | 69  | 42   | 68    |
| 98        | 34   |     | 87   | 58  | 48  | 18  | 39   | 132  | 126  | 104  | 251 | 59   | 59    |
| 99        | 12   | 26  |      | 15  | 25  | 0   | 23   | 4    | 5    | 10   | 0   | 2    | 10    |
| 100       | 230  | 25  | 25   |     | 44  | 10  | 429  | 11   | 312  | 78   | 82  | 37   | 44    |
| 101       | 28   | 78  | 29   | 61  |     | 7   | 362  | 29   | 55   | 105  | 47  | 13   | 47    |
| 102       | 9    | 28  | 12   | 8   | 21  |     | 15   | 4    | 15   | 21   | 8   | 8    | 12    |
| 103       | 828  | 41  | 119  | 410 | 249 | 16  |      | 17   | 409  | 95   | 524 | 30   | 119   |
| 104       | 6    | 19  | 7    | 21  | 88  | 0   | 7    |      | 9    | 23   | 3   | 10   | 9     |
| 105       | 359  | 160 | 122  | 348 | 24  | 21  | 269  | 30   |      | 5623 | 468 | 17   | 160   |
| 106       | 2223 | 780 | 490  | 646 | 474 | 148 | 3026 | 238  | 9666 |      | 583 | 353  | 583   |
| 107       | 154  | 328 | 84   | 74  | 33  | 16  | 101  | 86   | 65   | 120  |     | 427  | 86    |
| 109       | 194  | 193 | 49   | 77  | 35  | 61  | 32   | 27   | 103  | 103  | 456 |      | 77    |
| 110       |      | 80  | 693  | 259 | 4   | 2   | 4    | 6    | 20   | 21   | 10  | 99   | 20    |
| 111       | 119  |     | 91   | 15  | 10  | 10  | 4    | 14   | 11   | 79   | 44  | 43   | 15    |
| 112       | 171  | 128 |      | 65  | 62  | 34  | 14   | 37   | 74   | 172  | 58  | 47   | 62    |
| 113       | 247  | 59  | 57   |     | 15  | 29  | 26   | 18   | 60   | 38   | 48  | 305  | 48    |
| 114       | 208  | 17  | 509  | 16  |     | 9   | 3    | 7    | 17   | 24   | 12  | 13   | 16    |
| ColMedian | 171  | 68  | 87   | 65  | 35  | 16  | 29   | 17.5 | 62.5 | 87   | 53  | 39.5 |       |

Total count 42761  
 Total number of correct pairs 30989801  
 0.138%

| Index | 1    | 2    | 3    | 4    | 5    | 6   | 7    | 8   | 9    | 10   | 11   | 13   |
|-------|------|------|------|------|------|-----|------|-----|------|------|------|------|
| 97    |      | 68   | 52.9 | 277  | 64   | 22  | 76   | 14  | 65   | 150  | 69   | 42   |
| 98    | 34   |      | 87   | 58   | 48   | 18  | 39   | 132 | 126  | 104  | 251  | 59   |
| 99    | 12   | 26   |      | 15   | 25   | 0   | 23   | 4   | 5    | 10   | 0    | 2    |
| 100   | 230  | 25   | 25   |      | 44   | 10  | 52.9 | 11  | 52.9 | 78   | 82   | 37   |
| 101   | 28   | 78   | 29   | 61   |      | 7   | 52.9 | 29  | 55   | 105  | 47   | 13   |
| 102   | 9    | 28   | 12   | 8    | 21   |     | 15   | 4   | 15   | 21   | 8    | 8    |
| 103   | 52.9 | 41   | 119  | 52.9 | 249  | 16  |      | 17  | 52.9 | 95   | 52.9 | 30   |
| 104   | 6    | 19   | 7    | 21   | 88   | 0   | 7    |     | 9    | 23   | 3    | 10   |
| 105   | 52.9 | 160  | 122  | 52.9 | 24   | 21  | 269  | 30  |      | 52.9 | 52.9 | 17   |
| 106   | 52.9 | 52.9 | 52.9 | 52.9 | 52.9 | 148 | 52.9 | 238 | 52.9 |      | 52.9 | 52.9 |
| 107   | 154  | 52.9 | 84   | 74   | 33   | 16  | 101  | 86  | 65   | 120  |      | 52.9 |
| 109   | 194  | 193  | 49   | 77   | 35   | 61  | 32   | 27  | 103  | 103  | 52.9 |      |
| 110   |      | 80   | 52.9 | 259  | 4    | 2   | 4    | 6   | 20   | 21   | 10   | 99   |
| 111   | 119  |      | 91   | 15   | 10   | 10  | 4    | 14  | 11   | 79   | 44   | 43   |
| 112   | 171  | 128  |      | 65   | 62   | 34  | 14   | 37  | 74   | 172  | 58   | 47   |
| 113   | 247  | 59   | 57   |      | 15   | 29  | 26   | 18  | 60   | 38   | 48   | 52.9 |
| 114   | 208  | 17   | 52.9 | 16   |      | 9   | 3    | 7   | 17   | 24   | 12   | 13   |

Total count 10622  
 Cross-contamination corrected 0.034%

**Supplementary Table 6.3:** Quantification of index cross-contamination in MP-CAP from higher frequency false index pairs.

| Index     | 1     | 2     | 3     | 4    | 5      | 6    | 7    | 8    | 9     | 10    | 11     | RowMd  |
|-----------|-------|-------|-------|------|--------|------|------|------|-------|-------|--------|--------|
| 97        |       | 727   | 6949  | 1328 | 1206   | 1325 | 819  | 1885 | 184   | 894   | 1196   | 1201   |
| 98        | 621   |       | 781   | 1625 | 1167   | 965  | 941  | 1826 | 192   | 1135  | 1377   | 1050   |
| 99        | 19    | 63    |       | 52   | 46     | 51   | 30   | 68   | 17    | 60    | 58     | 51.5   |
| 100       | 1283  | 1277  | 976   |      | 2269   | 1694 | 1055 | 1794 | 290   | 1092  | 1931   | 1280   |
| 101       | 471   | 1141  | 363   | 1761 |        | 1211 | 1707 | 1596 | 253   | 944   | 1562   | 1176   |
| 102       | 425   | 747   | 345   | 1480 | 1284   |      | 837  | 1374 | 224   | 786   | 1037   | 811.5  |
| 103       | 2933  | 996   | 1326  | 1989 | 1215   | 1385 |      | 2103 | 363   | 833   | 5659   | 1355.5 |
| 104       | 327   | 704   | 425   | 951  | 1344   | 842  | 730  |      | 212   | 697   | 1098   | 717    |
| 105       | 1012  | 156   | 262   | 219  | 246    | 244  | 174  | 447  |       | 233   | 2522   | 245    |
| 106       | 1087  | 1667  | 880   | 1578 | 1733   | 1211 | 1645 | 1902 | 285   |       | 1891   | 1611.5 |
| 107       | 1142  | 1068  | 652   | 1916 | 1467   | 1626 | 1054 | 1976 | 461   | 1013  |        | 1105   |
| ColMedian | 816.5 | 871.5 | 716.5 | 1529 | 1249.5 | 1211 | 889  | 1810 | 238.5 | 863.5 | 1469.5 |        |

Total count 118717  
 Total number of correct pairs 27636356  
 0.428%

| Index                                | 1    | 2    | 3    | 4    | 5    | 6    | 7    | 8    | 9   | 10   | 11            |
|--------------------------------------|------|------|------|------|------|------|------|------|-----|------|---------------|
| 97                                   |      | 727  | 997  | 1328 | 1206 | 1325 | 819  | 1885 | 184 | 894  | 1196          |
| 98                                   | 621  |      | 781  | 1625 | 1167 | 965  | 941  | 1826 | 192 | 1135 | 1377          |
| 99                                   | 19   | 63   |      | 52   | 46   | 51   | 30   | 68   | 17  | 60   | 58            |
| 100                                  | 1283 | 1277 | 976  |      | 2269 | 1694 | 1055 | 1794 | 290 | 1092 | 1931          |
| 101                                  | 471  | 1141 | 363  | 1761 |      | 1211 | 1707 | 1596 | 253 | 944  | 1562          |
| 102                                  | 425  | 747  | 345  | 1480 | 1284 |      | 837  | 1374 | 224 | 786  | 1037          |
| 103                                  | 2933 | 996  | 1326 | 1989 | 1215 | 1385 |      | 2103 | 363 | 833  | 997           |
| 104                                  | 327  | 704  | 425  | 951  | 1344 | 842  | 730  |      | 212 | 697  | 1098          |
| 105                                  | 1012 | 156  | 262  | 219  | 246  | 244  | 174  | 447  |     | 233  | 2522          |
| 106                                  | 1087 | 1667 | 880  | 1578 | 1733 | 1211 | 1645 | 1902 | 285 |      | 1891          |
| 107                                  | 1142 | 1068 | 652  | 1916 | 1467 | 1626 | 1054 | 1976 | 461 | 1013 |               |
| <b>Total count</b>                   |      |      |      |      |      |      |      |      |     |      | 108103        |
| <b>Cross-contamination corrected</b> |      |      |      |      |      |      |      |      |     |      | <b>0.390%</b> |

### 5. Estimating false-assignment rates based on the occurrence of unused indexes

In standard multiplex sequencing experiments with single-indexed libraries, false-assignment rates can only be estimated by quantifying the occurrence of unused index sequences (2). These unused indexes are expected to appear if indexes are converted into each other due to errors in synthesis, amplification and sequencing or if there is cross-contamination among index PCR primers and indexed libraries. When we restrict our analysis to the forward index read, we determine false-assignment rates of 0.02% in no-CAP, 0.68% in SP-CAP and 0.004% in MP-CAP from five unused first indexes. We also performed the reciprocal analysis and analyzed perfect reverse index reads for which one index primer was not used. Here we obtained false-assignment rates of 0.001% for no-CAP, SP-CAP and MP-CAP, respectively. These rates can be combined to an estimate for false pairs by considering the average number of sequences observed for a first and a second index as well the expected number of sequences observed for a sample:

$$\frac{\overline{\#SeqIndex1} \cdot r_1 + \overline{\#SeqIndex2} \cdot r_2}{(\sum \#SeqIndex1 + \sum \#SeqIndex2) / (2 \cdot \#Samples)}$$

Using this formula, we obtain the joint estimates of:

|                                      | no-CAP        | SP-CAP        | MP-CAP        |
|--------------------------------------|---------------|---------------|---------------|
| Unused forward indexes ( $r_1$ )     | 0.020%        | 0.681%        | 0.004%        |
| Unused reverse index ( $r_2$ )       | 0.001%        | 0.001%        | 0.001%        |
| Number of samples                    | 17            | 17            | 11            |
| Average per used first index         | 2125542       | 3381013       | 2888431       |
| Average per used second index        | 2201444       | 2458359       | 2887183       |
| Sum used first indexes               | 31364391      | 41792106      | 31772738      |
| Sum used second indexes              | 31566651      | 40572152      | 31759009      |
| <b>Joint estimate unused indexes</b> | <b>0.024%</b> | <b>0.818%</b> | <b>0.005%</b> |

The false-assignment rates estimated from unused indexes is highest in SP-CAP. Since amplification and sequencing errors will only rarely convert one index sequence into another (see main text), these rates must almost exclusively reflect cross-contamination among indexed oligonucleotides or libraries.



### ***5. Identification of false sample assignments in single indexed data***

To quantify false index assignments in regular single index libraries, we used the 2x101+7 PE sequencing data from 7 present-day humans presented by Reich et al.(3). From the seven lanes, we separately aligned the forward and reverse read of all raw clusters to the  $\phi$ X174 reference genome using BWA(4) and identified false index assignments as reads with a  $\phi$ X alignment showing the designated sample index for the specific library. Supplementary Table 2 provides the results for the forward read with and without applying a minimum quality score filter of 15 to the index read out. In a second experiment of five lanes with mRNA libraries, generated using the Illumina TruSeq RNA Sample Prep Kit and sequenced on a single read run with 76+7 cycles, we obtain on average 0.14% to 0.17%  $\phi$ X174 contamination for each sample index, which reduces to 0.05-0.06% after applying the index quality filter (Supplementary Table 3).

### **SUPPLEMENTARY REFERENCES**

1. Meyer, M. and Kircher, M. (2010) Illumina Sequencing Library Preparation for Highly Multiplexed Target Capture and Sequencing. *Cold Spring Harb Protoc*, **2010**, pdb prot5448.
2. Meyer, M., Stenzel, U. and Hofreiter, M. (2008) Parallel tagged sequencing on the 454 platform. *Nat Protoc*, **3**, 267-278.
3. Reich, D., Green, R.E., Kircher, M., Krause, J., Patterson, N., Durand, E.Y., Viola, B., Briggs, A.W., Stenzel, U., Johnson, P.L. *et al.* (2010) Genetic history of an archaic hominin group from Denisova Cave in Siberia. *Nature*, **468**, 1053-1060.
4. Li, H. and Durbin, R. (2009) Fast and accurate short read alignment with Burrows-Wheeler transform. *Bioinformatics*, **25**, 1754-1760.
